# Supplementary material
Source: publisher figshare collection journal article supplement (https://sage.figshare.com/ndownloader/files/13569416)
Supplement: Supplementary file 1 [file 13569416]

## APPENDIX A

### Survey 1, Stanford Primary Care 2.0 Design Process, December 2015

#### Questions:

1. What did you think about the OVERALL Primary Care 2.0 design process?
2. What did you think about the Pre-work and Research activities for PC 2.0?
3. What did you think about the three Visioning events overall?
4. What do you think about the two System Design events overall?
5. What did you think about the Planning Session event overall?
6. What did you think about the Target Condition event overall?
7. What did you think about the Macro Design events overall?
8. What did you think about the Micro Design events overall?

#### Likert response options to questions above:

Strongly believe it was not valuable  
Somewhat believe it was not valuable  
Believe it was neither valuable nor not valuable  
Somewhat believe it was valuable  
Strongly believe it was valuable  
Did not participate

#### Final open-ended question:

Additional reflections on the process, subgroups, tours, team, leadership, facilitation, etc.?

## APPENDIX B

### Survey 2, Stanford Primary Care 2.0 Design Process, February and March 2016

1. The Primary Care 2.0 team applied a “3P” approach to designing the care model, work flows, and physical space.

How did the approach affect the team process and the output?

2. Please reflect on the dynamics during group sessions.

Were certain roles or voices considered more valuable than others? Were all roles and voices considered equal? How were group norms and expectations set and reinforced?

3. The PC 2.0 care team is multi-disciplinary and is thought to not be physician-led. Do you agree? How did the Design Team composition and group dynamics influence this? What other factors influenced this?

4. Overall, what facilitated the group process? What were the barriers?
